# Supplementary material
Source: HighWire-hosted journal article supplement (https://www.cmajopen.ca/highwire/filestream/84915/field_highwire_adjunct_files/0/2019-0194-1-at.pdf)
Supplement: 2019-0194-1-at.pdf [file 2019-0194-1-at.pdf]

## Appendix 1 (as supplied by authors)

| <b>Search terms:</b>                          |                                                       |
|-----------------------------------------------|-------------------------------------------------------|
| <b>Main demographic info</b>                  | <b>Lab info</b>                                       |
| Patient #                                     | Patient #                                             |
| Active                                        | Active                                                |
| MD Name                                       | Date                                                  |
| Chart Number                                  | Patient Number                                        |
| Privacy                                       | Doctor Number                                         |
| Preferred Name                                | MD Last Name                                          |
| Birthdate Year                                | MD First Name                                         |
| Postal Code                                   | Gastroenterology                                      |
| Sex                                           | Infectious Disease                                    |
| ICD-10                                        | Internal Medicine                                     |
| HIV                                           | Alpha-2 Macroglobulin                                 |
| DM2                                           | Lipoprotein A                                         |
| Transgender                                   | GGT                                                   |
| ICD-9                                         | Total Bilirubin                                       |
| Age                                           | ALT                                                   |
| Street Address Address Line 1                 | Lab Text Containing....."haptoglobin"                 |
| Address Line 2                                | TSH                                                   |
| Personal History (for NFA)                    | HBsAg (Lab Result)                                    |
| PROB/PROBLEM List (for Hep C/HCV etc)         | HBsAg (Lab Text Containing...)                        |
| PMHx/Past Medical History (for Hep C/HCV etc) | Hepatitis C Virus RNA                                 |
| RISK/RISK/Risk Factors (IVDU)                 | Lab Text Containing....."Hepatitis C RNA Viral Load:" |
| IVDU Problem List                             | Hepatitis C Antibody                                  |
| IVDU HPH                                      | INR                                                   |
| K026A                                         | Platelets                                             |
| K027A                                         | Albumin                                               |
| Roster Termination Date                       | AST                                                   |
| Last Seen Date                                | CPP Prob ICD-10                                       |
| Member Status                                 | HIV Antibody/HIV-1 RNA or HIV-2 RNA                   |
| Lab Text Containing..."Hepatitis C Antibody"  | Lab Text Containing....."Hepatitis C Genotype"        |
| Lab Text Containing..."Hepatitis C Viral RNA" | Lab Text Containing....."Hepatitis C Genotype: 1a"    |
| Rx Started; Name Contains..."Zepatier"        | Lab Text Containing....."Hepatitis C Genotype: 1b"    |
| Rx Started; Name Contains..."Daklinza"        | Lab Text Containing....."Hepatitis C Genotype: 2a"    |

Appendix to: von Aesch Z, Craig-Neil A, Shah H, et al. Family medicine–directed hepatitis C care and barriers to treatment: a mixed-methods study. *CMAJ Open* 2021. DOI:10.9778/cmajo.20190194. Copyright © 2021 The Author(s) or their employer(s).

To receive this resource in an accessible format, please contact us at [cmajgroup@cmaj.ca](mailto:cmajgroup@cmaj.ca).

|                                                    |                                                    |
|----------------------------------------------------|----------------------------------------------------|
|                                                    |                                                    |
| Rx Started; Name Contains..."Technivie"            | Lab Text Containing....."Hepatitis C Genotype: 2b" |
| Rx Started; Name Contains..."Viekira Pak"          | Lab Text Containing....."Hepatitis C Genotype: 2c" |
| Rx Started; Name Contains..."Harvoni"              | Lab Text Containing....."Hepatitis C Genotype: 2d" |
| Rx Started; Name Contains..."Sovaldi"              | Lab Text Containing....."Hepatitis C Genotype: 3a" |
| Rx Started; Name Contains..."Olysio"               | Lab Text Containing....."Hepatitis C Genotype: 3b" |
| Rx Started; Name Contains..."Incivek"              | Lab Text Containing....."Hepatitis C Genotype: 3c" |
| Rx Started; Name Contains..."Rebetol"              | Lab Text Containing....."Hepatitis C Genotype: 3d" |
| Rx Started; Name Contains..."Pegintron"            | Lab Text Containing....."Hepatitis C Genotype: 3e" |
| Rx Started; Name Contains..."Pegasis"              | Lab Text Containing....."Hepatitis C Genotype: 3f" |
| Rx Started; Name Contains..."Infergen"             | Lab Text Containing....."Hepatitis C Genotype: 4a" |
| Rx Started; Name Contains..."Victrelis"            | Lab Text Containing....."Hepatitis C Genotype: 4b" |
| Rx Started; Name Contains..."grazoprevir"          | Lab Text Containing....."Hepatitis C Genotype: 4c" |
| Rx Started; Name Contains..."daclatasvir"          | Lab Text Containing....."Hepatitis C Genotype: 4d" |
| Rx Started; Name Contains..."paritaprevir"         | Lab Text Containing....."Hepatitis C Genotype: 4e" |
| Rx Started; Name Contains..."ombitasvir"           | Lab Text Containing....."Hepatitis C Genotype: 4f" |
| Rx Started; Name Contains..."dasabuvir"            | Lab Text Containing....."Hepatitis C Genotype: 4g" |
| Rx Started; Name Contains..."ledipasvir"           | Lab Text Containing....."Hepatitis C Genotype: 4h" |
| Rx Started; Name Contains..."telaprevir"           | Lab Text Containing....."Hepatitis C Genotype: 4i" |
| Rx Started; Name Contains..."simeprevir"           | Lab Text Containing....."Hepatitis C Genotype: 4j" |
| Rx Started; Name Contains..."sofosbuvir"           | Lab Text Containing....."Hepatitis C Genotype: 5a" |
| Rx Started; Name Contains..."boceprevir"           | Lab Text Containing....."Hepatitis C Genotype: 6a" |
| Rx Started; Name Contains..."pegylated interferon" | Ultrasound Abdomen                                 |

|                                                             |                                           |
|-------------------------------------------------------------|-------------------------------------------|
| Rx Started; Name Contains..."pegylated interferon alpha-2b" | Misc. Diagnostic Imaging..."Fibroscan"    |
| Rx Started; Name Contains..."ribavirin"                     | fibroscan                                 |
| Rx Started; Name Contains..."interferon aphacon"            | liver biopsy                              |
| Rx Started; Name Contains..."elbasvir"                      | Progress Note containing....."APRI"       |
| Rx Started; Name Contains..."interferon"                    | Progress Note containing....."Fib-4"      |
| Spoken Language                                             | Progress Note containing....."Fibrosis-4" |
| Born in Canada                                              | Progress Note containing....."Fibrosis 4" |
| Year Arrived                                                | Progress Note containing....."APRI score" |
| Ethnicity                                                   |                                           |
| Disabilities                                                |                                           |
| Gender                                                      |                                           |
| Sexual Orientation                                          |                                           |
| Family Income                                               |                                           |
| People Supported by Income                                  |                                           |
| Preferred Language to Reac HCI                              |                                           |
| Religion                                                    |                                           |
| Housing                                                     |                                           |
